# Supplementary material
Source: publisher site journal article supplement (https://www.dovepress.com/article/431914)
Supplement: Supplementary file 1 [file get_supplementary_file.php]

## Semi-Structured In-depth Interview Guide (English Version)

Project Name: Lived experience of type 1 diabetes mellitus patient at Kemise General Hospital

Interviewer:-----Fake Name of Participant (ID):-----Date:-----  
-----

Start Time:-----End Time:-----Location:-----

### Part I: - Socio-Demographic Information

Age?..... in years.

Sex?.....

Marital status?:.....

Educational status?.....

Religion? .....

Occupational status? \_\_\_\_\_

How long have you had diabetes? \_\_\_\_\_ in years.

Family history of diabetes? \_\_\_\_\_

### Part II: - Lived Experience

1. When you think about living with diabetes, what emotions do you feel?

**Probe:** What kinds of psychological problems you have faced because of living with diabetes? Share your experience?

2. When you think of your future, what do you feel about the possibility of serious complications?

3. What are some things you do that help you solve (cope/manage) your feelings about your diabetes? **Probe:** Spiritual activities, social support, relationship health care provider

4. How do you find your diabetes limiting your social life? Probe: marriage, friendships, sexual activity, work, social participation like wedding)

5. Think of a time when you've had to tell someone you are diabetic. Can you describe that experience for me? Probe: to whom? your family members, friends and neighbors.

6. Think about the people you talk to or meet during a day. How do people treat you?. **Probe:** when they find out you have diabetes?

7. What support do you get from your family, friends and health care provider?

**Probe:** Share your experience

8. How do you find your financial income enough to meet your needs including medical treatment of diabetic mellitus?

**Probe:** How would you describe any difficulty to get enough financial income ?

9. How has your life changed since you became diabetic? (economical, socially)

10. Is there anything else you would like to share with me?

Thank you for participating in the interview.
